1 Original article

2 **Harmonizing Palliative Care: National Survey to Evaluate the Knowledge**  
3 **and Attitude of Emergency Physicians towards Palliative Care**

4 Aameena Mohammed Al-Ansari<sup>1</sup>, MBBCh, MRCP, Palliative Care Medicine Fellowship, Saleem  
5 Nawaf Suroor, <sup>2</sup> MBBCh, MRCP, Palliative Care Medicine Fellowship, Sobhi Mostafa AboSerea,<sup>3</sup>  
6 MBBCh, MSc, Wafaa Mostafa Abd-El-Gawad,<sup>4\*</sup> MBBCh, MSc, MD

7 <sup>1</sup> Palliative Care Center, Al-Sabah Health Area, Al-Shuwaikh, Kuwait. [dr\\_alansari@hotmail.com](mailto:dr_alansari@hotmail.com)

8 <sup>2</sup> Palliative Care Center, Al-Sabah Health Area, Al-Shuwaikh, Kuwait. [bonawaf77@gmail.com](mailto:bonawaf77@gmail.com)

9 <sup>3</sup> Palliative Care Center, Al-Sabah Health Area, Al-Shuwaikh, Kuwait. [sobhymaster@yahoo.com](mailto:sobhymaster@yahoo.com)

10 <sup>4\*</sup> Geriatrics and Gerontology department, Faculty of Medicine, Ain Shams University, Al-  
11 Abbasseya, Cairo, Egypt

12 E-mail: [wafaager@hotmail.com](mailto:wafaager@hotmail.com), [wafaager@med.asu.edu.eg](mailto:wafaager@med.asu.edu.eg)

13 Telephone: +201010031624, +96599920836

14 Running title: Knowledge and Attitude of Emergency Physicians towards Palliative Care

15 **Funding:** This research received a grant from Kuwait Foundation for the Advancement of Sciences  
16 (KFAS) under grant agreement no. P116-13NO-01.

17 **Authors' contributions:** Aameena Al-Ansari, Saleem Nawaf Suroor, Sobhi Mostafa AboSerea,  
18 **Wafaa Mostafa AbdElGawad:** study concept, study design, acquisition of subjects and data,  
19 interpretation of data, preparation of the manuscript. All authors had approved the final article.

20 **Competing interests:** The author(s) declared no potential conflicts of interest with respect to the  
21 research, authorship and/or publication of this article.

22

23 **Background and Aim:** Although the challenges of integrating palliative care practices  
24 across care settings are real and well recognized until now little is known about palliative  
25 care practice of emergency physicians (EPs) and their accessibility to palliative care services  
26 in Kuwait. So the aim of this study was to explore the attitude, and knowledge encountered  
27 by EPs in providing palliative care in all general hospitals in Kuwait.

28 **Method:** A cross-sectional survey was performed in the emergency rooms of all general  
29 hospitals in Kuwait using Palliative Care Attitude and Knowledge (PCKA) questionnaire.

30 **Results:** Of the total number of physicians working in emergency rooms (n=156), 104  
31 (66.67%) had completed the survey. 76.9% (n=80) of the EPs had either uncertain attitude  
32 toward palliative care. Most of the EPs (n=73, 70.28%) didn't discuss the need of the patients  
33 to palliative care either with the patients or their families. Only 16 (15.4%) of the EPs  
34 responded correctly to the most of the questions while nearly half of the EPs (n=51, 49%) had  
35 poor knowledge especially in the most effective management of refractory dysnea (n=18,  
36 17.3%). Experience  $\geq$  11yrs and better knowledge scores were independent predictors of  
37 positive attitude after adjustment of age, sex, qualifications, specialty, position, and  
38 nationality [OR: 5.747 (CI: 1.031-25.00), 1.458(CI: 1.148-1.851); p-value: 0.021, 0.002  
39 respectively]..

40 **Conclusions:** Despite recognizing palliative care as an important competence, the majority of  
41 the emergency physicians in Kuwait had uncertain attitude and poor knowledge towards  
42 palliative care. Lack of knowledge, direct accessibility to palliative care services and lack of  
43 support from palliative medicine specialists were the main reasons for uncertain and negative  
44 attitude. Efforts should be done to enhance physician training and provide palliative care  
45 resources in order to improve the quality of care given to patients visiting emergency  
46 departments.

48 **Keywords:** Palliative care, Palliative Care Attitude and Knowledge (PCKA), Emergency  
49 physicians, opioids, Kuwait.

***What this paper adds***

- Studies proved that the emergency room may be a suitable place for early referral of patients who may benefit from palliative care especially old age to prevent upcoming undesired admissions and hospital deaths.
- The integration of palliative care concepts and consultation teams into emergency medicine may help to avoid unnecessary and burdensome treatments, tests, and procedures that are not aligned with patients' goals of care.
- Although the challenges of integrating palliative care practices across care settings are real and well recognized until now little is known about palliative care practice of emergency physicians and their accessibility to palliative care services in Kuwait.
- Recently, a newly developed tool called Palliative Care Attitude and Knowledge (PCKA) questionnaire was created to assess the attitude and knowledge of non-palliative physicians toward palliative care. So the aim of this study was to explore the attitude, and knowledge encountered by emergency physicians in providing palliative care using PCKA<sup>8</sup> in emergency departments in all general
- Studies showed that early palliative care consultation was shown to improve quality of life for cancer patients and may even lengthen their survival.

50

***What this study adds***

- Despite recognizing palliative care as an important competence, the majority of the emergency physicians in Kuwait had uncertain attitude and poor knowledge towards palliative care. Lack of knowledge, direct accessibility to palliative care services and lack of support from palliative medicine specialists were the main reasons for uncertain and negative attitude.
- Efforts should be done to enhance physician training and provide palliative care resources in order to improve the quality of care given to patients visiting emergency departments.

51

52

53

54

55

56

57

58 **Introduction:**

59 Emergency medicine is a medical specialty that is concerned with stabilization of  
60 patients with acute illness or injury for definitive care.<sup>1</sup> In this specialty, emergency  
61 physicians are trained to provide acute treatments for emergency medical conditions aiming  
62 at preserving patients' life regardless of their wellbeing.<sup>1,2</sup>

63 While patients and their families under palliative care can experience stressful and  
64 overwhelming moments during the disease trajectory such as sudden respiratory distress,  
65 severe pain, vomiting, confusion and many other symptoms,<sup>3</sup> the first point of access is often  
66 the emergency room. Unfortunately, many of them die in the hospitals despite their wish to  
67 die at home.<sup>4</sup> Hospitals; where palliative medicine specialists are available; can provide the  
68 opportunity for the patients and their families to establish their preferences for care and to  
69 coordinate the aggressiveness of treatment, symptom management, and place of death.<sup>3,4</sup>

70 Moreover, early palliative care consultation was shown to improve quality of life for  
71 cancer patients and may even lengthen their survival.<sup>5</sup> Most recently, studies proved that the  
72 emergency room may be a suitable place for early referral of patients who may benefit from  
73 palliative care<sup>6</sup> especially old age to prevent upcoming undesired admissions and hospital  
74 deaths.<sup>7</sup>

75 The integration of palliative care concepts and consultation teams into emergency  
76 medicine may help to avoid unnecessary and burdensome treatments, tests, and procedures  
77 that are not aligned with patients' goals of care.<sup>2</sup> Although the challenges of integrating  
78 palliative care practices across care settings are real and well recognized until now little is known  
79 about palliative care practice of emergency physicians and their accessibility to palliative care  
80 services in Kuwait. Recently, a newly developed tool called Palliative Care Attitude and Knowledge  
81 (PCKA) questionnaire was created to assess the attitude and knowledge of non-palliative physicians

82 toward palliative care.<sup>8</sup> So the aim of this study was to explore the attitude, and knowledge  
83 encountered by emergency physicians in providing palliative care using PCAK<sup>8</sup> in emergency  
84 departments in all general hospitals in Kuwait.

## 85 **Method:**

### 86 **Study design and setting:**

87 A cross-sectional survey was performed in the emergency rooms of all general  
88 hospitals under the Ministry of Health of Kuwait. This includes six general hospitals; Al-  
89 Sabah, Al-Jahra, Al-Amiri, Al-Adan, Al-Farawanyia and Mubarak Al-Kabeer hospitals.

### 90 **Measurements and intervention:**

91 Palliative Care Attitude and Knowledge Questionnaire (PCKA):<sup>8</sup>

92 It is a newly developed questionnaire composed of three sections. Section one  
93 includes demographic data such as age, sex, level of education, work experience, workplace,  
94 medical subspecialty and palliative care experience. Section two is assessing the attitude and  
95 formed of 11 items. The tool had a 5 point Likert scale ranging from strongly disagree (1) to  
96 strongly agree (5). Negative or unfavorable attitude was considered if the participant scored  
97  $\leq 25$ , uncertain attitude if scored  $>25$  but  $<41$ , positive or favorable attitude if scored  $\geq 41$ .  
98 The third section inquiries about knowledge. It includes 2 parts; the first part was about the  
99 self-reported knowledge (3 questions) and the second part is 12 clinical questions. Regarding  
100 self-knowledge, 5 points likert scale was used ranging from excellent response (5) to none  
101 (1). Regarding basic knowledge scoring; Poor knowledge was calculated if participant scored  
102 less than 50% of the total score (12 points) ( $\leq 5$  points), fair knowledge if  $\geq 50\%$  to  $<75\%$   
103 (6-9 points), good knowledge if scored  $>75\%$  ( $\geq 10$  points).<sup>8</sup>

104 **Selection of Participants:**

105           The questionnaires were distributed to all emergency physicians in all general  
106 hospital in Kuwait (Figure 1) and recollected back by hand to hand and revised within 48  
107 hours. The flowchart of the sampling procedure was presented in Figure 1.

108 **Ethical statement:**

109           The approval of the Institutional Review Board (IRB) of the Ministry of Health  
110 was taken prior to the study (No.210/2016, March 2016). Informed consent was obtained  
111 from all participants. Participants' anonymity and confidentiality were kept throughout all  
112 phases of the study. Approvals were also obtained from participating emergency departments  
113 of all general hospitals.

114 **Statistical analysis:**

115           All data manipulation and analysis were performed using the SPSS (Statistical  
116 Package for Social Science) SPSS version 20. P-values less than 0.05 were regarded as a sign  
117 of statistical significance. Independent sample t-test was used for comparison between  
118 quantitative data. Chi-square test or Fisher's Exact when appropriate were used to compare  
119 between qualitative variables. Generalized linear method was used to find out the  
120 independent predictors of positive attitude toward palliative care with adjustment of any  
121 confounding factors. We used the consolidated criteria for reporting observational studies  
122 (RECORD) checklist as far as this was applicable to our study.

123 **Results:**

124 **Characteristics of study subjects:**

125 Of the total number of physicians working in emergency rooms in Kuwait (n=156  
126 physicians), 19 physicians were on annual leave and 11 physicians refused to participate. The  
127 remaining 126 emergency physicians who responded to the questionnaire, 104 (82.54%) had  
128 completed the survey in all general hospitals. (Figure1). The number of participants was 15  
129 (14.2%) from AlSabah hospital, 20 (19.2%) from Al-Amiri hospital, 18 (20%) from Mubarak  
130 Al-Kabeer hospital, 20 (17.33%) from Al-Farawanyia hospital, 14 (13.5%) from Al-Adan  
131 hospital and 17 (20.44%) from Al-Jahrah hospital. (Figure 1).

132 86.6% (n=90) were males and 13.5% (n=14) were females and mean age of the  
133 respondents was 38.83±9.5 years old. The median years of experience were 11 (IQR: 7-13)  
134 years. Due to the diversity of population demographics, only 20.19% (n=21) were Kuwaiti  
135 physicians. Most of respondents had postgraduate emergency medicine studies (n=68;  
136 65.4%), followed by internal medicine studies (12; 11.5%). (Table 1).

### 137 **Main results:**

138 Only 18.3% (n=19) of the emergency physicians had a favorable attitude towards  
139 palliative care. Most of them had uncertain attitude (76.9%, n=80) and 4.8% (n=5) had an  
140 unfavorable attitude. Most of them agreed about the need of all adults and children who are  
141 terminally ill for palliative care services, not just those with cancer (Q7: n =65; 62.5%) and  
142 approved also that palliative care benefits include enhanced quality of life for the patient and  
143 family (Q9:n=81; 77.9%), skilled care for terminally ill patients (Q10: n=82; 78.8%), and  
144 expert pain and symptom management (Q11: n=85; 81.7%). Unfortunately, they emphasized  
145 onthe lack of timely communication between palliative care providers and themselves (Q2:  
146 n=71; 68.3%). Many of them dissatisfied with palliative care services in the past (Q1: n=61;  
147 58.7%), reported unfamiliarity with the currently available palliative care services (Q3: n=65;  
148 62.5%), and its types (Q5:n=54; 51.9%). Moreover, the uncertainty about its length of

149 coverage was 53.8% (Q4: n=56). Generally, the emergency physicians with experience  $\geq 11$   
150 years had statistically significant better attitude scores than the emergency physicians with  
151 experience  $< 11$  (p value=0.019, Figure 2) but in most of the individualized items of the  
152 attitude, no statistically significant between them.

153 Most of the emergency physicians (n=73, 70.28%) didn't discuss the need of the  
154 patients to palliative care either with the patients or their families. 44 (42.3%) of them  
155 reported no or little knowledge in pain assessment and management, while 58 (55.8%) and 41  
156 (39.4%) reported good knowledge in other symptoms assessment and management, and the  
157 counseling respectively. Neither years of experience nor nationality had any statically  
158 significant effect on self-assessment of their knowledge and experience of the emergency  
159 physicians towards palliative care. (Table 1).

160 The overall percentage of the emergency physicians that responded correctly to the  
161 most of the questions about the basic knowledge of palliative care was only 16 (15.4%) while  
162 37 (35.6%) had a fair knowledge and unfortunately many of them (n=51; 49%) responded to  
163  $> 50\%$  of the questions incorrectly. The median number of total corrected answers was 6  
164 (IQR: 4-8) out of 12. Surprisingly, none of the emergency physicians answered all the  
165 questions correctly. An overview of the questions and their answers was presented in Table 3.  
166 Q11 for the symptoms of cord compression was the one with the highest percentage of  
167 correct answers (Q11: n=94; 90.4%) while Q8 about the most effective treatment for the  
168 refractory dyspnea question had the lowest rate of correct answers (Q8:n=18;17.3%). They  
169 had mostly poor to fair knowledge regarding opioids handling; such as types of opioids  
170 (Q3:n=57;54.8%), World Health Organization ladder for pain management (Q7:  
171 n=39;37.5%), opioids toxicity (Q8:n=31; 29.8%), use of oral opioids (Q15:n=19; 18.3%); and



172 delirium (Q4:n=62; 59.65%) and management of catastrophic bleeding in palliative setting  
173 (Q10:n=20; 19.2%).

174 Most of the emergency physicians had good knowledge scores regarding the  
175 differences between traditional and palliative care (Q1: n=79; 76%) and the multidisciplinary  
176 team role in palliative care (Q2:n=83; 79.8%). No statistically significant differences between  
177 years of experience of the emergency physicians and their knowledge scores (Figure 3) in  
178 most of the questions except palliative care definitions and signs of opioid toxicity in which  
179 the emergency physicians with less experience answered significantly better (86% vs 66.7%,  
180 40% vs 20.4%; p-value: 0.024, 0.029 respectively) while in diagnosis of superior venous  
181 obstruction, the emergency physicians with more years of experience answered better (12%  
182 vs 35.2%; p-value: 0.011). No statistically significant differences between the emergency  
183 physicians from different hospitals in the attitude or knowledge scores or demographic  
184 characteristics. (Table 4).

185 By using generalized linear method to find out the independent predictors of positive  
186 attitude toward palliative care, we found that years of experience  $\geq 11$  yrs and better  
187 knowledge scores were independent predictors of positive attitude after adjustment of age,  
188 sex, qualifications, specialty, position, and nationality [OR: 5.747 (CI: 1.031-25.00),  
189 1.458(CI: 1.148-1.851); p-value: 0.021, 0.002 respectively]. (Table 5)

## 190 **Discussion**

191 To the best of our knowledge, this is the first survey of its kind conducted in Kuwait  
192 to evaluate palliative care attitude and knowledge targeting the emergency physicians  
193 anywhere in the entire region. We used PCAK which is a newly developed validated and  
194 reliable tool<sup>8</sup> to assess the attitude and knowledge among physicians. There are more than  
195 150 physicians working in the emergency rooms in 6 hospitals distributed all over Kuwait.

196 Most of them had uncertain attitude and poor knowledge scores. Better knowledge scores and  
197 experience  $\geq 11$  yrs were positive predictors of favorable attitude. Although more than 10  
198 different nationalities are existing in Kuwait like Egyptians, Syrians, Pakistanis, Indians, and  
199 others from different cultures, emergency rooms demographic, medical education, specialties,  
200 years of experience but no statically significant differences between them in their knowledge  
201 or attitude toward palliative care. This differed from many studies which reported that  
202 clinician attitudes or knowledge were affected by nationality, physicians' position, staff type,  
203 years of experience, emergency rooms demographic and hospital type.<sup>9</sup>

204 In our study, 76.9% of the emergency physicians had either uncertain attitude toward  
205 palliative care while only 18.3% had a favorable or positive attitude. This was mainly due to  
206 either dissatisfaction about PC services, types, accessibility, length of coverage and lastly  
207 lack of timely communication between them and palliative care providers as reported in our  
208 study. These results is similar to the original results of PCAK questionnaire.<sup>8</sup> Many factors  
209 affecting the attitude of the emergency physicians depending on their diverse experiences,  
210 which ranged from positive, encouraging to a negative and distressing expierence.<sup>9,10</sup> This  
211 includes sometimes a sense of incompetence to alter the course of the disease<sup>3, 11</sup> or feeling  
212 anxious and uncomfortable about discussing death and dying with the terminally ill  
213 patient.<sup>12,13</sup> This negative attitude can hinder the quality of care provision especially at the  
214 end of life.

215 Most of the emergency physicians (n=73, 70.28%) didn't discuss the need to  
216 palliative care either with the patients or their families. The willingness to engage in end-of-  
217 life discussions becomes key to improve palliative care in the emergency department.<sup>14, 15</sup>  
218 However, palliative care referrals remain largely underutilized in all areas of healthcare and  
219 are characteristically initiated late in the disease trajectory.<sup>16,17</sup> Furthermore, most of the

220 emergency physicians feel that it is not their obligation to discuss the need for palliative care  
221 and they feel that the family physicians or the oncologists are the one who is responsible  
222 about this discussion.<sup>3,18</sup>

223 Nearly half of the emergency physicians (49%) had poor knowledge. Although many  
224 of them subjectively reported good knowledge in counseling and other symptoms (rather than  
225 pain) assessment and management and they strongly agreed that palliative care is an  
226 important competence for emergency physicians<sup>3,18</sup> but it wasn't necessarily reflected in their  
227 effectiveness of care especially in view of their poor knowledge at most. These results is  
228 similar to the original results of PCAK questionnaire.<sup>8</sup>

229 They had mostly poor knowledge in opioids handling, delirium and management of  
230 catastrophic bleeding in the palliative setting. This is similar to many studies that reported a  
231 lack of knowledge in palliative care, especially pain management proficiency.<sup>18-20</sup>

232 The setting of emergency rooms; as crowded spaces, noisy environment,  
233 compromised privacy, frequent interruptions, time constraints, illness complexity, and  
234 medico-legal threats;<sup>21,22</sup> make the initiation of palliative care discussions less than ideal in  
235 these settings.<sup>3,22</sup> Unfortunately, being not confident with the diagnosis and concerns of  
236 diminishing patients' or families' hope, or believing that patients are not prepared to hear  
237 forthcoming information make physicians often hesitate to discuss patients prognosis either  
238 with the patients or their families.<sup>22</sup> Subsequently, aggressive interventions often initiated  
239 may ultimately be misaligned with overall goals of care although retrospectively viewed as  
240 futile, harmful, and painful.<sup>23</sup> In reality, the culture of emergency setting that provides  
241 stabilization of acute medical emergencies was sometimes at odds with the culture of  
242 palliative care, which balances quality of life with the burdens of invasive treatments.<sup>2,18</sup>

243 In our study, good knowledge was positively associated with the positive attitude of  
244 the emergency physicians toward palliative care. This was agreed with Thulesius et al. who  
245 revealed that good knowledge of staff significantly improved attitudes toward the end of life  
246 care and the authors suggested initiatives to educate physicians working in ED's will help  
247 them to change their negative attitudes and contribute better quality of patient care.<sup>24</sup>

248 Many studies reported a significant correlation between the level of knowledge and  
249 attitudes towards palliative care. This is highlighting that as participants' level of knowledge  
250 increased, attitudes become more positive in hospitals such as in Lebanon,<sup>25</sup> Ethiopia,<sup>26</sup>  
251 Saudi Arabia,<sup>27</sup> and India.<sup>28</sup> As a part of human nature, the degree and complexity of their  
252 knowledge affect their attitudes and in turn their behavior.<sup>29</sup>

253 The effective measurement of knowledge and attitude of the physicians is an important  
254 component of the evaluation of education and practice especially if used prior to any  
255 educational activity or program. This would result in more willingness to contribute in  
256 discussion and generate greater receptivity to the educational materials.<sup>30,31</sup> Again it can be  
257 applied post activity to document the change in their knowledge and attitude and at the same  
258 time to evaluate the efficiency of the training and educational program.

259 Strength and limitation of the study:

260 It is the first study to assess the knowledge and attitude of the emergency physicians  
261 toward palliative care in the entire region. All the emergency physicians in Kuwait were  
262 involved in the research with no selection bias. The scarcity of similar studies carried out in  
263 Kuwait, Eastern Mediterranean region and in other parts of the world made the comparison  
264 and discussion difficult. Palliative care is recently introduced in Kuwait and it is still in the  
265 phase of development with the shortage of the number of the available palliative medicine  
266 specialists, this may explain the uncertain or the negative attitude towards palliative care.

267           Despite recognizing palliative care as an important competence, the majority of the  
268 emergency physicians in Kuwait had uncertain attitude and poor knowledge towards  
269 palliative care. Lack of knowledge, direct accessibility to palliative care services and lack of  
270 support from palliative medicine specialists were the main reasons for uncertain and negative  
271 attitude.

272   **Conclusion:**

273   Despite recognizing palliative care as an important competence, the majority of the  
274 emergency physicians in Kuwait had uncertain attitude and poor knowledge towards  
275 palliative care. Lack of knowledge, direct accessibility to palliative care services and lack of  
276 support from palliative medicine specialists were the main reasons for uncertain and negative  
277 attitude. Efforts should be done to enhance physician training and provide palliative care  
278 resources in order to improve the quality of care given to patients visiting emergency  
279 departments. Attention should be given to palliative care by the national health policy. There  
280 is an urgent need to be incorporated into the national curriculum of medical students and the  
281 emergency physicians' education. Further efforts are needed to push the palliative care across  
282 different healthcare sectors.

283   **Ethics approval and consent to participate:** The research project has been approved by the  
284 Institutional Review Board (IRB) of the Ministry of Health, Kuwait (No.210/2016, March  
285 2016) within which the work was undertaken and that it conforms to the provisions of the  
286 Declaration of Helsinki. All subjects gave informed consent and their anonymity was  
287 preserved.

288   **Consent for publication:** not applicable.

289 **Availability of data and materials:** The datasets generated during and/or analyzed during  
290 the current study are available from the corresponding author on reasonable request.

291 **Competing interests:** The author(s) declared no potential conflicts of interest with respect to  
292 the research, authorship and/or publication of this article.

293 **Funding:** This research received a grant from Kuwait Foundation for the Advancement of  
294 Sciences (KFAS) under grant agreement no. P116-13NO-01.

295 **Authors' contributions: Aameena Al-Ansari, Saleem Nawaf Suroor, Sobhi Mostafa**  
296 **AboSerea, Wafaa Mostafa AbdeIGawad:** study concept, study design, acquisition of  
297 subjects and data, interpretation of data, preparation of the manuscript. All authors had  
298 approved the final article.

## 299 **Acknowledgements**

300 The authors would like to thank all the participants for their valuable contributions to this  
301 study.

## 302 **References:**

- 303 1- Schneider SM1, Hamilton GC, Moyer P, Stapczynski JS. Definition of emergency  
304 medicine. *Acad Emerg Med* 1998;5(4):348-51.
- 305 2- Grudzen CR1, Richardson LD, Hopper SS, Ortiz JM, Whang C, Morrison RS. Does  
306 palliative care have a future in the emergency department? Discussions with attending  
307 emergency physicians. *J Pain Symptom Manag.* 2012;43(1):1-9.
- 308 3- Rivera MR, Torres FS. Physician Attitudes on the Provision of Palliative Care in  
309 Puerto Rican Emergency Departments. *J Palliat Care Med* 2015; 5: 201.
- 310 4- Pritchard RS, Fisher ES, Teno JM, Sharp SM, Reding DJ, et al. Influence of patient  
311 preferences and local health system characteristics on the place of death. SUPPORT  
312 Investigators. Study to understand prognoses and preferences for risks and outcomes  
313 of treatment. *Journal of the American Geriatric Society* 1998; 46: 1242-1250.
- 314 5- Temel JS, Greer JA, Muzikansky A, et al. Early palliative care for patients with  
315 metastatic non-small-cell lung cancer. *N Engl J Med* 2010; 363:733–742. [PubMed:  
316 20818875]
- 317 6- Lipinski M, Eagles D, Fischer LM, Mielniczuk L, Stiell IG. Heart failure and  
318 palliative care in the emergency department. *Emerg Med J* 2018; 35(12):726-729. doi:  
319 10.1136/emermed-2017-207186.

- 320 7- Beynon T, Gomes B, Murtagh FEM, Glucksman Ed, Parfitt A, Burman R, et al.  
321 How common are palliative care needs among older people who die in the emergency  
322 department? *Emerg Med J* 2011;28(6):491-5. doi: 10.1136/emj.2009.090019.
- 323 8- Al-Ansari AM, Suroor SN, AboSerea SM, Abd-El-Gawad WM. Development of  
324 palliative care attitude and knowledge (PcAK) questionnaire for physicians in  
325 Kuwait. *BMC Palliat Care*. 2019;18(1):49. doi:10.1186/s12904-019-0430-9. PubMed  
326 PMID: 31170968; PubMed Central PMCID: PMC6555752.
- 327 9- Cheung KY, Chan KC. Experiences of healthcare professionals in providing palliative  
328 end-of-life care to patients in emergency departments: a systematic review protocol.  
329 *JBIC Database System Rev Implement Rep* 2016;14(10):9-14.
- 330 10- Jackson V, Mack J, Matsuyama R, Lakoma M, Sullivan A, Arnold R, et al. A  
331 qualitative study of oncologists' approaches to end-of-life care. *J Palliat Med* 2008;  
332 11(6):893–906.
- 333 11- Peters L, Cant R, Payne S, O'Connor M, McDermott F, Hood K, et al. How death  
334 anxiety impacts nurses' caring for patients at the end of life: a review of literature.  
335 *Open Nurs J* 2013;7:14–21.
- 336 12- Tait V, Higgs M, Magann L, Dixon J, Davis J, Fernandez R. Attitudes of  
337 nonpalliative care nurses towards palliative care. *Intl J Palliat Care* 2015;2015:1–6.
- 338 13- Hui D, Bansal S, Park M, Reddy A, Cortes J, Fossella F, et al. Differences in attitudes  
339 and beliefs toward end-of-life care between hematologic and solid tumor oncology  
340 specialists. *Ann Oncol* 2015;26(7): 1440–6.
- 341 14- Shearer FM, Rogers IR, Monterosso L, Ross-Adjie G, Rogers JR. Understanding  
342 emergency department staff needs and perceptions in the provision of palliative care.  
343 *Emerg Med Australas* 2014;26(3):249–55.
- 344 15- Heaston S, Beckstrand RL, Bond AE, Palmer SP. Emergency nurses' perceptions of  
345 obstacles and supportive behaviors in end-of-life care. *J Emerg Nurs* 2006;32(6):477–  
346 85.
- 347 16- Kistler EA, Sean Morrison R, Richardson LD, Ortiz JM, Grudzen CR. Emergency  
348 department-triggered palliative care in advanced cancer: proof of concept. *Acad  
349 Emerg Med* 2015;22(2):237–9.
- 350 17- Zimmermann C, Swami N, Krzyzanowska M, Hannon B, Leighl N, Oza A, et al.  
351 Early palliative care for patients with advanced cancer: a cluster-randomised  
352 controlled trial. *Lancet* 2014;383(9930):1721–30.
- 353 18- Stone SC, [Mohanty S](#), [Grudzen CR](#), [Shoenberger J](#), Asch S, [Kubrick K](#), Lorenz KA  
354 **Emergency medicine physicians' perspectives of providing palliative care in an  
355 emergency department.** *J Palliat Med*. 2011; 14(12):1333-8. doi:  
356 10.1089/jpm.2011.0106.
- 357 19- Goldonowicz JM, Runyon MS, Bullard MJ. Palliative care in the emergency  
358 department: an educational investigation and intervention. *BMC Palliative Care* 2018;  
359 17:43. <https://doi.org/10.1186/s12904-018-0293-5>
- 360 20- Chan GK. End-of-life models and emergency department care. *Acad Emerg Med*  
361 2004;11(1):79–86.
- 362 21- Jesus J, Geiderman J, Venkat A, et al. Physician orders for life-sustaining treatment  
363 and emergency medicine: ethical considerations, legal issues, and emerging trends.  
364 *Ann Emerg Med*. 2014;64(2):140–4.
- 365 22- Limehouse WE, Feeser VR, Bookman KJ, Derse A. A model for emergency  
366 department end-of-life communications after acute devastating events—part II:  
367 moving from resuscitative to end-of-life or palliative treatment. *Acad Emerg Med*  
368 2012;19(11):1300–8.

- 369 23-7. Forero R, McDonnell G, Gallego B, et al. A Literature Review on Care at the End-  
370 of-Life in the Emergency Department. *Emergency Medicine International*.  
371 2012;2012:486516.
- 372 24- Thulesius H, Petersson C, Petersson K, Håkansson A. Learnercentred education in  
373 end-of-life care improved well being in home care staff: a prospective controlled  
374 study. *Palliat Med* 2002;16: 347-354.
- 375 25- Huijjer AH, Dimassi H. Palliative care in Lebanon: knowledge, attitudes and practices  
376 of physicians and nurses. *J Med Liban* 2007;55(3):121-8.
- 377 26- Kassa H, Murugan R, Zewdu F, Hailu M, Woldeyohannes D. Assessment of  
378 knowledge, attitude and practice and associated factors towards palliative care among  
379 nurses working in selected hospitals, Addis Ababa, Ethiopia. *BMC Palliat Care*  
380 2014;4:13(1):6.
- 381 27- Abudari G, Zahreddine H, Hazeim H, Assi MA, Emara S. Knowledge of and attitudes  
382 towards palliative care among multinational nurses in Saudi Arabia. *Int J Palliat Nurs*  
383 2014;20(9):435-41.
- 384 28- Das A, Haseena T. Knowledge and Attitude of Staff Nurses Regarding Palliative  
385 Care. *International Journal of Science and Research* 2015; 4 (11):1790-5.
- 386 29- Fabrigar LR, Petty RE, Smith SM, Crites SL Jr. Understanding knowledge effects on  
387 attitude-behavior consistency: the role of relevance, complexity, and amount of  
388 knowledge. *J Pers Soc Psychol* 2006;90(4):556-77.
- 389 30- Kawaguchi S, Mirza R, Nissim R, & Ridley J. Internal Medicine Residents' Beliefs,  
390 Attitudes, and Experiences Relating to Palliative Care: A Qualitative Study. *American*  
391 *Journal of Hospice and Palliative Medicine* 2017; 34(4), 366–372.
- 392 31- von Gunten C F, Twaddle M, Preodor M, Neely K J, Martinez J, & Lyons J. Evidence  
393 of improved knowledge and skills after an elective rotation in a hospice and palliative  
394 care program for internal medicine residents. *Am J Hosp Palliat Care* 2005;22(3):195-  
395 203.

397

398

399

400

401

402

403

404

405

406

407

408



409 **Table 1: General description of the emergency physicians in Kuwait**

|                                      |                         | Total<br>(N=104) | experience<br><11yrs(n=50) | experience<br>≥11yrs(n=54) | p-<br>value* |
|--------------------------------------|-------------------------|------------------|----------------------------|----------------------------|--------------|
| Age                                  |                         | 38.83(±9.5)      | 32.12(3.88)                | 45.03(8.87)                | <0.001       |
| Sex                                  | Males                   | 90(86.6%)        | 39(78%)                    | 51(94.4%)                  | 0.014        |
|                                      | females                 | 14(13.5%)        | 11(22%)                    | 3(5.6%)                    |              |
| Nationality                          | Kuwaiti                 | 21(20.2%)        | 18(38%)                    | 3(5.6%)                    | <0.001       |
|                                      | Non-Kuwaiti             | 83(79.8%)        | 32(64%)                    | 51(94.4%)                  |              |
| Qualification                        | MBBS                    | 30(28.8%)        | 21(42%)                    | 9(16.7%)                   |              |
|                                      | Master                  | 59 (56.7%)       | 24(48%)                    | 35(64.8%)                  | 0.202**      |
|                                      | MD, MRCP/MRCS           | 15(14.5%)        | 5(10%)                     | 10(18.6%)                  |              |
| Specialty                            | ER                      | 68(65.4%)        | 32(64%)                    | 36(66.7%)                  |              |
|                                      | Internal Medicine       | 12(11.5%)        | 2(4%)                      | 10(18.5%)                  |              |
|                                      | Surgery                 | 10(9.6%)         | 4(8%)                      | 6(11.1%)                   |              |
|                                      | Family Medicine         | 3(2.9%)          | 3(6%)                      | 0                          |              |
|                                      | Others                  | 11(10.6%)        | 9(18%)                     | 2(3.7%)                    | 0.007**      |
| Position                             | Assistant registrar     | 6(5.8%)          | 6(12%)                     | 0                          |              |
|                                      | Registrar               | 86(82.7%)        | 40(80%)                    | 46(85.2%)                  | 0.020**      |
|                                      | Senior registrar        | 8(7.7%)          | 4(8%)                      | 4(7.4%)                    |              |
|                                      | Specialist/ Consultant  | 4(3.8%)          | 0                          | 4(7.4%)                    |              |
| Discussion about<br>palliative care  | No patients             | 73(70.2%)        | 34(68%)                    | 39(72.2%)                  |              |
|                                      | 1 to 5 patients         | 23(22.1%)        | 11(22%)                    | 12(22.2%)                  |              |
|                                      | 6 to 10 patients        | 6(5.8%)          | 4(8%)                      | 2(3.7%)                    | 0.726**      |
|                                      | 11 to 15 patients       | 1(1%)            | 1(2%)                      | 0                          |              |
|                                      | > 15 patients, families | 1(1%)            | 0                          | 1(1.9%)                    |              |
| Self-assessment of his knowledge in: |                         |                  |                            |                            |              |
| 1-Pain                               | Excellent               | 3(2.9%)          | 1(2%)                      | 2(3.7%)                    |              |
|                                      | very good               | 15(14.4%)        | 8(16%)                     | 7(13%)                     |              |
|                                      | good                    | 42(40.4%)        | 21(42%)                    | 21(38.9%)                  | 0.311**      |
|                                      | weak                    | 29(27.9%)        | 10(20%)                    | 19(35.2%)                  |              |
|                                      | none                    | 15(14.4%)        | 10(20%)                    | 5(9.3%)                    |              |
| 2-Other Symptoms                     | Excellent               | 4(3.8%)          | 2(4%)                      | 2(3.7%)                    |              |
|                                      | very good               | 21(20.2%)        | 10(20%)                    | 11(20.4%)                  | 0.683**      |
|                                      | good                    | 58(55.8%)        | 28(56%)                    | 30(55.6%)                  |              |
|                                      | weak                    | 14(13.5%)        | 5(10%)                     | 9(16.7%)                   |              |
|                                      | none                    | 7(6.7%)          | 5(10%)                     | 2(3.7%)                    |              |
| 3-Councling                          | Excellent               | 6(5.8%)          | 2(4%)                      | 4(7.4%)                    |              |
|                                      | very good               | 29(27.9%)        | 15(30%)                    | 14(25.6%)                  |              |
|                                      | good                    | 41(39.4%)        | 20(40%)                    | 21(38.9%)                  | 0.402**      |
|                                      | weak                    | 18(17.3%)        | 6(12%)                     | 12(22.2%)                  |              |
|                                      | none                    | 10(9.6%)         | 7(14%)                     | 3(5.6%)                    |              |

410 \*p- value < 0.05 is significant.

411 \*\*- Fisher Exact

412

413

414

415

416

417

418

419 **Table 2: Distributions of the emergency physicians' attitude towards palliative care in Kuwait**

|                                                                                                                |                   | Total<br>(n=104) | experience<br><11yrs(n=50) | experience<br>≥11yrs(n=54) | p-<br>value* |
|----------------------------------------------------------------------------------------------------------------|-------------------|------------------|----------------------------|----------------------------|--------------|
| Q1-I have been dissatisfied with PC services in the past                                                       | Positive attitude | 16(15.4%)        | 5(10%)                     | 11(20.4%)                  | 0.232        |
|                                                                                                                | Negative attitude | 61(58.7%)        | 29(58%)                    | 32(59.3%)                  |              |
|                                                                                                                | Not sure          | 27(26%)          | 16(32%)                    | 11(20.4%)                  |              |
| Q2-I feel there is a lack of timely communication between PC providers and myself.                             | Positive attitude | 10(9.6%)         | 5(10%)                     | 5(9.35)                    | 0.992        |
|                                                                                                                | Negative attitude | 71(68.3%)        | 34(68%)                    | 37(68.5%)                  |              |
|                                                                                                                | Not sure          | 22(21.2%)        | 11(22%)                    | 12(22.2%)                  |              |
| Q3- I am not familiar with PC services in this community.                                                      | Positive attitude | 17(16.3%)        | 6(12%)                     | 11(20.4%)                  | 0.358        |
|                                                                                                                | Negative attitude | 65(62.5%)        | 31(62%)                    | 34(63%)                    |              |
|                                                                                                                | Not sure          | 22(21.2%)        | 13(26%)                    | 9(16.7%)                   |              |
| Q4-I am uncertain of the length of coverage under the PC benefit.                                              | Positive attitude | 13(12.5%)        | 4(8%)                      | 9(16.7%)                   | 0.006        |
|                                                                                                                | Negative attitude | 56(53.8%)        | 35(70%)                    | 21(38.9%)                  |              |
|                                                                                                                | Not sure          | 35(33.7%)        | 11(22%)                    | 24(44.4%)                  |              |
| Q5- I am uncertain of the type of services covered under the PC benefit.                                       | Positive attitude | 13(12.5%)        | 7(14%)                     | 6(11.1%)                   | 0.925        |
|                                                                                                                | Negative attitude | 54(51.9%)        | 26(52%)                    | 28(51.9%)                  |              |
|                                                                                                                | Not sure          | 37(35.6%)        | 17(34%)                    | 20(37%)                    |              |
| Q6- Patients or families are unwilling or unready to elect PC services.                                        | Positive attitude | 29(27.9%)        | 15(30%)                    | 14(25.9%)                  | 0.910        |
|                                                                                                                | Negative attitude | 33(31.7%)        | 15(30%)                    | 18(33.3%)                  |              |
|                                                                                                                | Not sure          | 42(40.4%)        | 20(40%)                    | 22(40.7%)                  |              |
| Q7- All adults and children who are terminally ill are candidates for PC services, not just those with cancer. | Positive attitude | 65(62.5%)        | 29(58%)                    | 36(66.7%)                  | 0.561        |
|                                                                                                                | Negative attitude | 11(10.6%)        | 5(10%)                     | 6(11.1%)                   |              |
|                                                                                                                | Not sure          | 28(26.9%)        | 16(32%)                    | 12(22.2%)                  |              |
| Q8-Patients receiving radiation for palliation of symptoms are not candidates for PC.                          | Positive attitude | 49(47.1%)        | 10(20%)                    | 13(24.1%)                  | 0.691        |
|                                                                                                                | Negative attitude | 23(22.1%)        | 26(52%)                    | 23(42.6%)                  |              |
|                                                                                                                | Not sure          | 32(30.8%)        | 12(28%)                    | 18(33.3%)                  |              |
| Q9- PC benefits include enhanced quality of life for the patient and family.                                   | Positive attitude | 81(77.9%)        | 39(78%)                    | 42(77.8%)                  | 0.763**      |
|                                                                                                                | Negative attitude | 6(5.8%)          | 2(4%)                      | 4(7.4%)                    |              |
|                                                                                                                | Not sure          | 17(16.3%)        | 9(18%)                     | 8(14.8%)                   |              |
| Q10-PC benefits include skilled care for terminally ill patients.                                              | Positive attitude | 82(78.8%)        | 42(84%)                    | 40(74.1%)                  | 0.091**      |
|                                                                                                                | Negative attitude | 5(4.8%)          | 0(0%)                      | 5(9.35)                    |              |
|                                                                                                                | Not sure          | 17(16.3%)        | 8(16%)                     | 9(16.7%)                   |              |
| Q11-PC benefits include expert pain and symptom management.                                                    | Positive attitude | 85(81.7%)        | 40(80%)                    | 45(83.3%)                  | 0.608**      |
|                                                                                                                | Negative attitude | 4(3.8%)          | 3(6%)                      | 1(1.9%)                    |              |
|                                                                                                                | Not sure          | 15(14.4%)        | 7(14%)                     | 8(14.8%)                   |              |

420 *PC: palliative care.\* p- value < 0.05 is significant.*

421 *\*\*-. Fisher Exact*

422

423

424

425

426

427

428

429

430 **Table 3: Distributions of the emergency physicians' knowledge towards palliative care in**  
 431 **Kuwait**

|                           |             | Total(N=104) | experience<br><11yrs(n=50) | experience<br>≥11yrs(n=54) | p-<br>value* |
|---------------------------|-------------|--------------|----------------------------|----------------------------|--------------|
| Knowledge                 | Total score | 5.68(2.5)    | 5.92(2.20)                 | 5.46(2.68)                 | 0.347        |
| Objective assessment      |             |              |                            |                            |              |
| 4- PC Definition          | True        | 79(76%)      | 43(86%)                    | 36(66.7%)                  | 0.024        |
|                           | False       | 25(24%)      | 7(14%)                     | 18(33.3%)                  |              |
| 5- Members of PC team     | True        | 83(79.8%)    | 43(86%)                    | 40(74.1%)                  | 0.149        |
|                           | False       | 21(20.2%)    | 7(14%)                     | 14(25.9%)                  |              |
| 6- Weak Opioids           | True        | 57(54.8%)    | 28(56%)                    | 29(46.3%)                  | 0.846        |
|                           | False       | 47(45.2%)    | 22(44%)                    | 25(46.3%)                  |              |
| 7- Delirium               | True        | 62(59.6%)    | 33(66%)                    | 29(53.7%)                  | 0.234        |
|                           | False       | 42(40.4%)    | 17(34%)                    | 25(46.3%)                  |              |
| 8- Dyspnea                | True        | 18(17.3%)    | 9(18%)                     | 9(16.7%)                   | 0.857        |
|                           | False       | 86(82.7%)    | 41(82%)                    | 45(83.3%)                  |              |
| 9- Hypercalcaemia         | True        | 65(62.5%)    | 29(58%)                    | 36(66.7%)                  | 0.420        |
|                           | False       | 39(37.5%)    | 21(42%)                    | 18(33.3%)                  |              |
| 10- WHO pain management   | True        | 39(37.5%)    | 21(42%)                    | 18(33.3%)                  | 0.420        |
| ladder                    | False       | 65(62.5%)    | 29(58%)                    | 36(66.7%)                  |              |
| 11- Opioid toxicity       | True        | 31(29.8%)    | 20(40%)                    | 11(20.4%)                  | 0.029        |
|                           | False       | 73(70.2%)    | 30(60%)                    | 43(79.6%)                  |              |
| 12- SVC obstruction       | True        | 25(24%)      | 6(12%)                     | 19(35.2%)                  | 0.011        |
|                           | False       | 79(75.9%)    | 44(88%)                    | 35(64.8%)                  |              |
| 13- Catastrophic bleeding | True        | 20(19.2%)    | 10(20%)                    | 10(18.5%)                  | 0.848        |
|                           | False       | 84(80.8%)    | 40(80%)                    | 44(81.5%)                  |              |
| 14- Spinal cord           | True        | 94(90.4%)    | 45(90%)                    | 49(90.7%)                  | 0.999**      |
| compression               | False       | 10(9.6%)     | 5(10%)                     | 5(9.3%)                    |              |
| 15- Oral opioids          | True        | 19(18.3%)    | 9(18%)                     | 10(18.5%)                  | 0.945        |
|                           | False       | 85(81.7%)    | 41(82%)                    | 44(81.5%)                  |              |

432 *PC: palliative care, WHO: World Health Organization, SVC: superior venacaval obstruction. \* p-value < 0.05 is significant*

433 *\*\* : Fisher Exact*

434

435

436

437

438

439

440

441

442

443

444

445

446 **Table (5): Generalized linear model of predictors of positive attitude:**

|                                             | B     | SE    | OR    | 95% CI |       | p- value |
|---------------------------------------------|-------|-------|-------|--------|-------|----------|
|                                             |       |       |       | Lower  | Upper |          |
| Sex (male)                                  | 0.641 | 0.805 | 1.899 | 0.392  | 9.194 | 0.426    |
| Age                                         | 0.025 | 0.038 | 1.026 | 0.953  | 1.104 | 0.501    |
| Nationality (Kuwaiti)                       | 0.393 | 0.809 | 1.482 | 0.304  | 7.233 | 0.627    |
| Qualification (master, MBBS)                | 0.621 | 1.01  | 0.538 | 0.075  | 3.877 | 0.538    |
| Position (assistant registrar or registrar) | 0.419 | 1.19  | 0.658 | 0.064  | 6.752 | 0.724    |
| Subspecialty                                | 0.399 | 0.567 | 0.538 | 0.075  | 3.877 | 0.538    |
| Years of experience                         | 1.75  | 0.756 | 5.747 | 1.031  | 25.00 | 0.021    |
| Basic knowledge score                       | 0.377 | 0.122 | 1.458 | 1.148  | 1.851 | 0.002    |

\* *p*-value < 0.05 is significant

447

448

449

450

451

452

453

454

455

456

457

458

459

460

461

462 **Table 4: Comparison between the emergency physicians' characteristics working in**  
 463 **different hospitals in Kuwait**

|                          | <b>Mubarak AlKabeer<br/>(N=18)</b> | <b>AlAdan<br/>(N=14)</b> | <b>AlSabah<br/>(N=15)</b> | <b>Al-Jahra<br/>(N=17)</b> | <b>Al-Farawanyia<br/>(N=20)</b> | <b>Al-An<br/>(N=20)</b> |
|--------------------------|------------------------------------|--------------------------|---------------------------|----------------------------|---------------------------------|-------------------------|
| Age                      | 40.11(±11.6)                       | 39.64(±10.4)             | 43.11(±8.8)               | 34.25(±5.2)                | 39.4(±9.8)                      | 36.95(0)                |
| Sex                      |                                    |                          |                           |                            |                                 |                         |
| • Males                  | 14(77.8%)                          | 13(92.9%)                | 14(93.3%)                 | 17(100.0%)                 | 16(80.0%)                       | 16(80.0%)               |
| • Females                | 4(22.2%)                           | 1(7.1%)                  | 1(6.7%)                   | 0                          | 4(20.0%)                        | 4(20.0%)                |
| Nationality              |                                    |                          |                           |                            |                                 |                         |
| • Kuwaiti                | 5(27.8%)                           | 2(14.3%)                 | 2(13.3%)                  | 1(5.9%)                    | 5(25.0%)                        | 6(30.0%)                |
| • Others                 | 13(72.2%)                          | 12(85.7%)                | 13(86.7%)                 | 16(94.1%)                  | 15(75.0%)                       | 14(70.0%)               |
| Qualification            |                                    |                          |                           |                            |                                 |                         |
| • MBBS                   | 4(22.2%)                           | 2(14.3%)                 | 1(6.7%)                   | 3(17.6%)                   | 7(35.0%)                        | 11(55.0%)               |
| • Master                 | 12(66.7%)                          | 8(57.1%)                 | 8(53.3%)                  | 14(82.4%)                  | 12(60.0%)                       | 7(35.0%)                |
| • MD                     | 2(11.1%)                           | 4(28.6%)                 | 6(40.0%)                  | 0                          | 1(5.0%)                         | 2(10.0%)                |
| Position                 |                                    |                          |                           |                            |                                 |                         |
| • Assistant registrar    | 2(11.1%)                           | 0                        | 0                         | 1(5.0%)                    | 1(5.0%)                         | 2(10.0%)                |
| • Registrar              | 14(77.8%)                          | 10(71.4%)                | 11(73.3%)                 | 16(94.1%)                  | 18(90.0%)                       | 17(85.0%)               |
| • Senior registrar       | 1(5.6%)                            | 4(28.6%)                 | 1(6.7%)                   | 0                          | 1(5.0%)                         | 1(5.0%)                 |
| • Specialist/ Consultant | 1(5.6%)                            | 0                        | 3(20%)                    | 0                          | 0                               | 0                       |
| Specialty                |                                    |                          |                           |                            |                                 |                         |
| • Emergency Medicine     | 8(44.4%)                           | 12(85.7%)                | 8(53.3%)                  | 10(58.8%)                  | 16(80.0%)                       | 14(70.0%)               |
| • Internal Medicine      | 5(27.8%)                           | 1(7.1%)                  | 2(13.3%)                  | 2(11.8%)                   | 1(5.0%)                         | 1(5.0%)                 |
| • Surgery                | 0                                  | 0                        | 3(20.0%)                  | 1(5.9%)                    | 3(15.0%)                        | 3(15.0%)                |
| • Others                 | 5(27.8%)                           | 1(7.1%)                  | 2(13.3%)                  | 4(23.5%)                   | 0                               | 2(10.0%)                |
| Experience yrs)          | 14.11(±9.6)                        | 14.79(±10.5)             | 17.47(±8.5)               | 9.38(±5.1)                 | 15.05(±10.3)                    | 10.9(±)                 |
| Attitude                 |                                    |                          |                           |                            |                                 |                         |
| • Positive attitude      | 7(38.9%)                           | 7(50.0%)                 | 5(33.3%)                  | 4(23.5%)                   | 5(25.0%)                        | 6(30.0%)                |
| • Negative attitude      | 2(11.1%)                           | 2(14.3%)                 | 4(26.7%)                  | 5(29.4%)                   | 3(15.0%)                        | 5(25.0%)                |
| • Not sure               | 9(50.0%)                           | 5(35.7%)                 | 6(40.0%)                  | 8(47.1%)                   | 12(60.0%)                       | 9(45.0%)                |
| Knowledge                |                                    |                          |                           |                            |                                 |                         |
| Total score              | 4.78(2.25)                         | 6.0(2.51)                | 6.07(2.81)                | 6.12(2.48)                 | 5.65(2.43)                      | 5.6(2.4)                |
| • Good knowledge         | 1(5.6%)                            | 3(21.4%)                 | 4(26.7%)                  | 3(17.6%)                   | 3(15.0%)                        | 2(10.0%)                |
| • Fair knowledge         | 6(33.3%)                           | 4(28.6%)                 | 6(40.0%)                  | 7(41.2%)                   | 7(35.0%)                        | 7(35.0%)                |
| • Poor knowledge         | 11(61.1%)                          | 7(50.0%)                 | 5(33.3%)                  | 7(41.2%)                   | 10(50.0%)                       | 11(55.0%)               |

464 \* P value < 0.05 is significant \*\* Fisher Exact

465

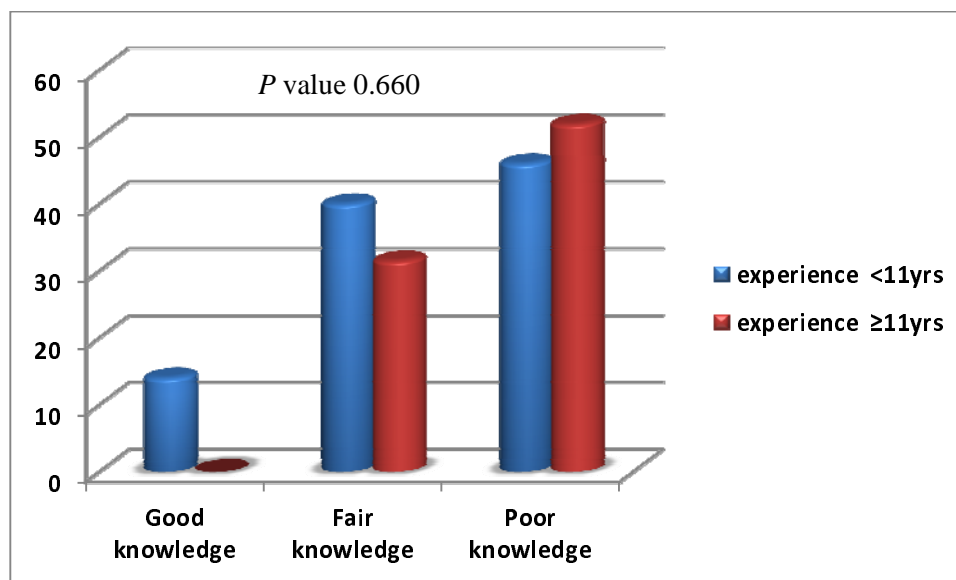

Figure (2): Knowledge of Emergency Physicians toward Palliative Care

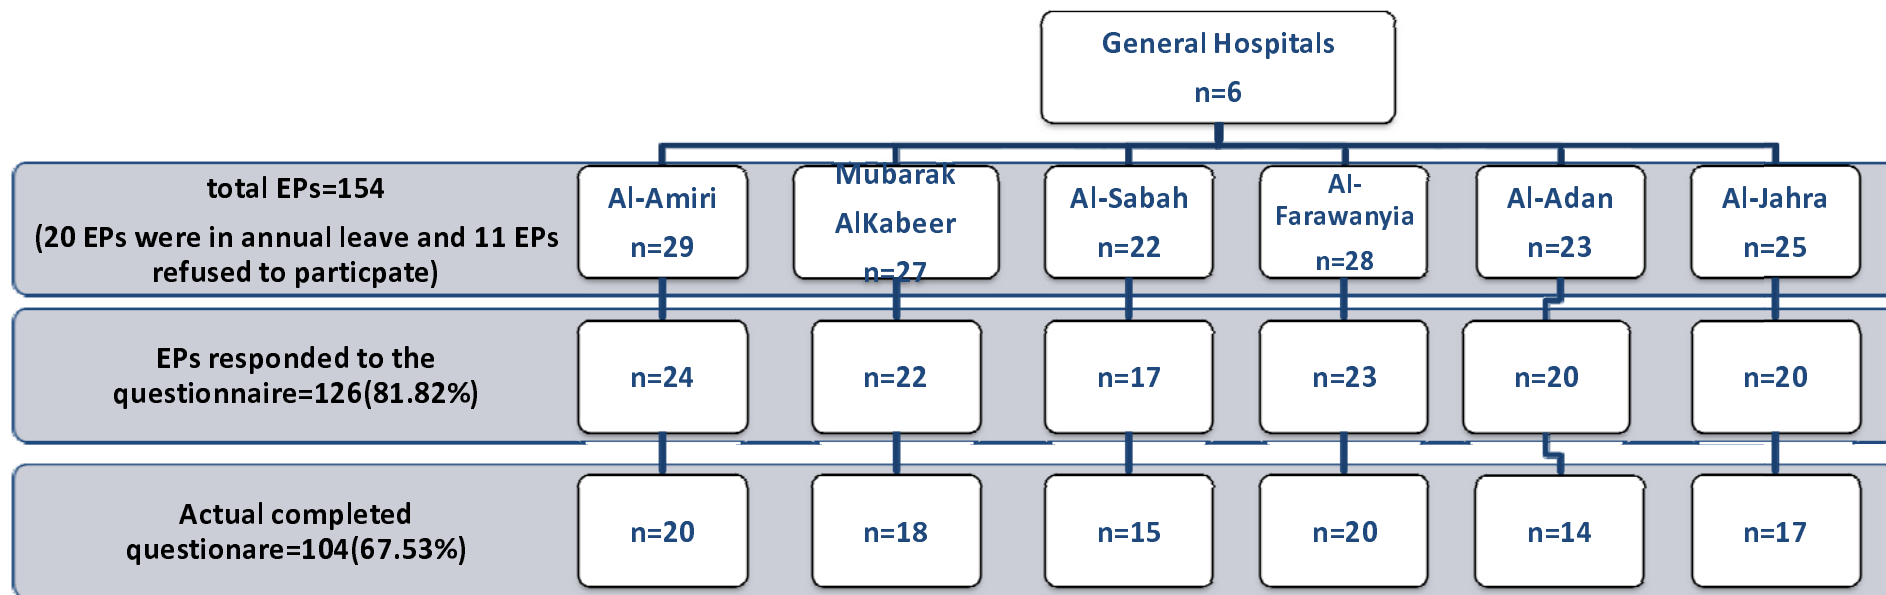

Figure 1: The Flowchart for the sampling procedure

EPs: emergency physicians

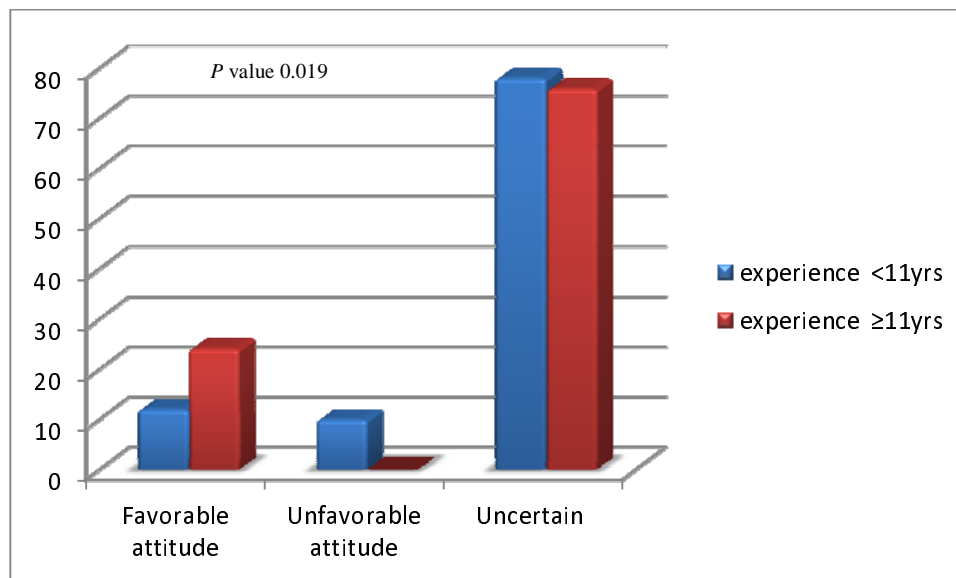

**Figure (2): Attitude of Emergency Physicians toward Palliative Care**
